# Supplementary material for: Analysis of Epithelial and Mesenchymal Markers in Ovarian Cancer Reveals Phenotypic Heterogeneity and Plasticity
Source: PubMed Central journal article supplement (PMC3021543; doi:10.1371/journal.pone.0016186), 2011-01-14
Supplement: pone.0016186.s008.pdf [file pone.0016186.s008.pdf]

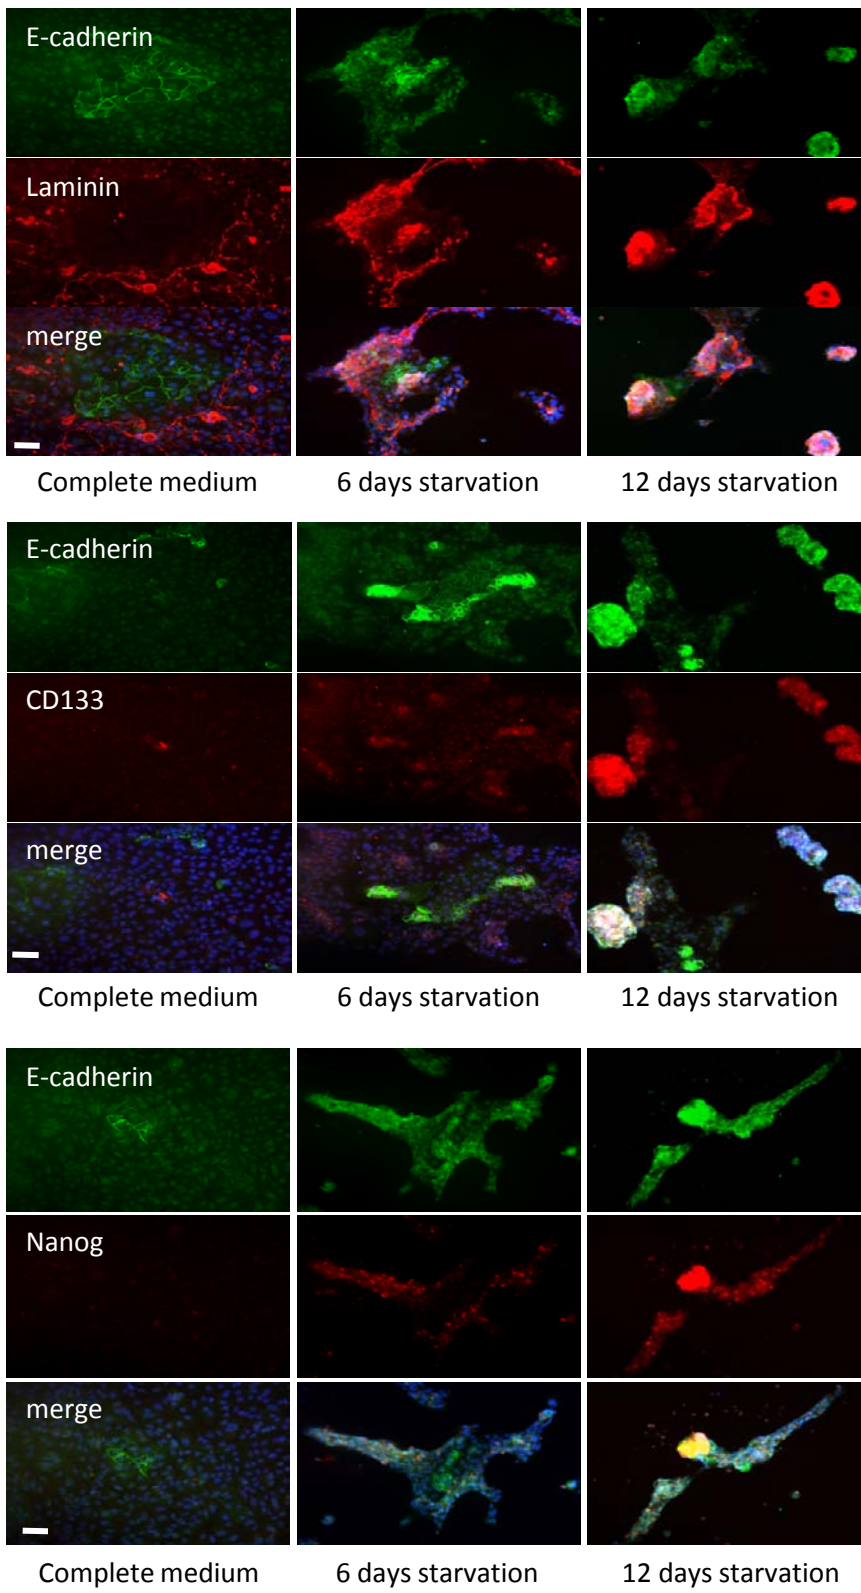

**Figure S8**
