# Supplementary material for: Analysis of Epithelial and Mesenchymal Markers in Ovarian Cancer Reveals Phenotypic Heterogeneity and Plasticity
Source: PubMed Central journal article supplement (PMC3021543; doi:10.1371/journal.pone.0016186), 2011-01-14
Supplement: pone.0016186.s009.pdf [file pone.0016186.s009.pdf]

**Table S1**

| <i>primary ovarian cancer cultures that were passageable &gt;10x</i> |               |                     |                         |                    |                                          |
|----------------------------------------------------------------------|---------------|---------------------|-------------------------|--------------------|------------------------------------------|
|                                                                      | <b>origin</b> | <b>chemotherapy</b> | <b>sphere formation</b> | <b>tumorigenic</b> | <b>CD133+ E/M cells <i>in vivo</i>**</b> |
| He 1070                                                              | biopsy        |                     | x                       | x                  | x                                        |
| He 109M                                                              | biopsy        |                     | x                       | x                  | x                                        |
| He 122                                                               | biopsy        |                     | x                       | x                  | x                                        |
| He 145                                                               | biopsy        |                     | x                       | x                  | x                                        |
| ovc 0117                                                             | biopsy        |                     | x                       |                    | n.t.                                     |
| ovc 0117-2                                                           | ascites*      |                     |                         | n.t.               | n.t.                                     |
| ovc 0122                                                             | biopsy        |                     | x                       |                    | x                                        |
| ovc 1204                                                             | ascites       |                     |                         |                    | n.t.                                     |
| ovc 1207                                                             | biopsy        |                     |                         |                    | x                                        |
| ovc 1208                                                             | biopsy        |                     | x                       |                    | x                                        |
| ovc 1276                                                             | ascites       |                     |                         |                    | n.t.                                     |
| ovc 227                                                              | biopsy        |                     | x                       |                    | x                                        |
| ovc 316                                                              | biopsy        | x                   | x                       | x                  | x                                        |
| ovc 316om                                                            | biopsy/met    | x                   | x                       | x                  | x                                        |
| ovc 405                                                              | biopsy        | x                   | x                       | x                  | x                                        |
| ovc 514                                                              | biopsy        |                     | x                       |                    | x                                        |
| ovc 514-2                                                            | ascites*      |                     |                         |                    | n.t.                                     |
| ovc 615                                                              | biopsy        |                     |                         |                    | n.t.                                     |
| ovc 622                                                              | biopsy        |                     |                         |                    | n.t.                                     |
| ovc 624                                                              | biopsy        | x                   |                         |                    | n.t.                                     |
| ovc 712                                                              | biopsy        |                     |                         |                    | n.t.                                     |
| ovc 727                                                              | biopsy        |                     | x                       |                    | x                                        |
| ovc 727-2                                                            | ascites*      |                     |                         | n.t.               | n.t.                                     |
| ovc 910                                                              | biopsy        |                     | x                       |                    | x                                        |
| <i>primary ovarian cancer cultures that were passageable &lt;10x</i> |               |                     |                         |                    |                                          |
|                                                                      | <b>origin</b> | <b>chemotherapy</b> |                         |                    |                                          |
| ovc 0111                                                             | biopsy        | x                   |                         |                    |                                          |
| ovc 0112                                                             | biopsy        |                     |                         |                    |                                          |
| ovc 0112-2                                                           | ascites*      |                     |                         |                    |                                          |
| ovc 0119                                                             | biopsy        | x                   |                         |                    |                                          |
| ovc 0120                                                             | biopsy        |                     |                         |                    |                                          |
| ovc 0121                                                             | biopsy        |                     |                         |                    |                                          |
| ovc 1025                                                             | biopsy        |                     |                         |                    |                                          |
| ovc 1102                                                             | biopsy        |                     |                         |                    |                                          |
| ovc 1102-2                                                           | ascites*      |                     |                         |                    |                                          |
| ovc 1105                                                             | biopsy        |                     |                         |                    |                                          |
| ovc 1122                                                             | ascites       |                     |                         |                    |                                          |
| ovc 1123                                                             | biopsy        |                     |                         |                    |                                          |
| ovc 118                                                              | biopsy        |                     |                         |                    |                                          |
| ovc 12032                                                            | ascites       |                     |                         |                    |                                          |
| ovc 210                                                              | biopsy        | x                   |                         |                    |                                          |
| ovc 608                                                              | biopsy        |                     |                         |                    |                                          |
| ovc 609                                                              | biopsy        | x                   |                         |                    |                                          |
| ovc 708                                                              | biopsy        |                     |                         |                    |                                          |
| ovc 921                                                              | biopsy        |                     |                         |                    |                                          |
| ovc 922                                                              | biopsy        |                     |                         |                    |                                          |
| <b>Nomenclature</b>                                                  |               |                     |                         |                    |                                          |
| n.t. - not tested                                                    |               |                     |                         |                    |                                          |
| * - matching ascites to biopsy from same patient                     |               |                     |                         |                    |                                          |
| **-immunofluorescence analysis of biopsy sections                    |               |                     |                         |                    |                                          |
