# Supplementary material for: Analysis of Epithelial and Mesenchymal Markers in Ovarian Cancer Reveals Phenotypic Heterogeneity and Plasticity
Source: PubMed Central journal article supplement (PMC3021543; doi:10.1371/journal.pone.0016186), 2011-01-14
Supplement: pone.0016186.s010.pdf [file pone.0016186.s010.pdf]

Table S2

| Antibody                         | Host   | Dilution | Vendor                                            |
|----------------------------------|--------|----------|---------------------------------------------------|
| <b>For immunohistochemistry</b>  |        |          |                                                   |
| b-catenin-FTIC                   | mouse  | 1:100    | BD Transduction Laboratories, San Jose, CA,       |
| AE1/AE3                          | mouse  | 1:100    | BD Transduction Laboratories, San Jose, CA,       |
| CA125                            | mouse  | 1:100    | Dako, Glostrup, Denmark                           |
| Caldesmon                        | rabbit | 1:100    | abcam, Cambridge, MA                              |
| CD133                            | rabbit | 1:500    | abcam                                             |
| CD31                             | rabbit | 1:100    | abcam                                             |
| CEA                              | rabbit | 1:100    | Biomedica Corp, Foster Crty, CA                   |
| Claudin7                         | rabbit | 1:100    | abcam                                             |
| E-cadherin                       | mouse  | 1:200    | Sigma, St Louis MO                                |
| E-cadherin                       | rabbit | 1:100    | Cell Signaling Technology, Inc, Danvers, MA       |
| E-cadherin-FTIC                  | mouse  | 1:200    | BD Biosciences, San Jose, CA                      |
| EpCAM                            | mouse  | 1:100    | Biomedica Corp                                    |
| human mitochondria               | mouse  | 1:200    | BD Transduction Laboratories, San Jose, CA,       |
| Laminin                          | rabbit | 1:400    | Dako, Glostrup, Denmark                           |
| N-cadherin                       | rabbit | 1:150    | GeneTex Inc, Miaoli, Taiwan, R.O.C                |
| Nanog                            | mouse  | 1:10?    | R&D System, Minneapolis, MN                       |
| NGAL                             | rabbit | 1:100    | abcam                                             |
| Oct-4                            | rabbit | 1:200    | Cell Signaling Technology, Inc, Danvers, MA       |
| Snail                            | rabbit | 1:100    | abcam                                             |
| Sox2                             | rabbit | 1:100    | abcam                                             |
| Tie 2                            | goat   | 1:100    | R&D System                                        |
| Twist                            | rabbit | 1:100    | abcam                                             |
| VCAM1                            | mouse  | 1:100    | abcam                                             |
| Vimentin                         | mouse  | 1:200    | Sigma,                                            |
| Vimentin                         | rabbit | 1:100    | Sigma,                                            |
| Anti-rabbit-AF488                | goat   | 1:400    | Invitrogen/ Molecular Probes, Eugene, OR          |
| Anti-rabbit-AF568                | goat   | 1:400    | Invitrogen/ Molecular Probes                      |
| Anti-mouse-AF488                 | goat   | 1:400    | Invitrogen/ Molecular Probes                      |
| Anti-mouse-AF568                 | goat   | 1:400    | Invitrogen/ Molecular Probes                      |
| Anti-goat-AF568                  | donkey | 1:400    | Invitrogen/ Molecular Probes                      |
| Anti-rat-AF568                   | goat   | 1:400    | Invitrogen/ Molecular Probes                      |
| Anti-rabbit-AF405                | goat   | 1:200    | Invitrogen/ Molecular Probes                      |
| <b>For flow cytometry</b>        |        |          |                                                   |
| CD133/1-APC                      | mouse  | 1:10     | Miltenyi Biotec, Auburn, CA                       |
| CD133/1-PE                       | mouse  | 1:10     | Miltenyi Biotec                                   |
| CD44-PE                          | mouse  | 1:10     | BD Pharmingen, San Diego, CA                      |
| E-cadherin-AF488                 | mouse  | 1:20     | Biologend, San Diego, CA                          |
| EpCAM-FTIC                       | mouse  | 1:10     | Stem Cell Technologies Inc, Vancouver, BC, Canada |
| Ki-67                            | rabbit | 1:10     | Stem Cell Technologies Inc, Vancouver, BC, Canada |
| Tie2-APC                         | mouse  | 1:10     | R&D System                                        |
| Vimentin-PE                      | mouse  | 1:10     | abcam                                             |
| Anti-rabbit-AF488                | goat   | 1:200    | Invitrogen/ Molecular Probes                      |
| <b>For MACS and FACS sorting</b> |        |          |                                                   |
| Anti-biotin MicroBeads           |        |          | Miltenyi Biotec                                   |
| CD133/2-biotin                   | mouse  | 1:5      | Miltenyi Biotec                                   |
| E-cadherin-APC                   | mouse  | 1:10     | Biologend Inc, San Diego, CA                      |
| Tie2-PE                          | mouse  | 1:5      | R&D System                                        |
| <b>For Western blotting</b>      |        |          |                                                   |
| CD133                            | mouse  | 1:500    | Miltenyi Biotec                                   |
| E-cadherin                       | rabbit | 1:1000   | Cell Signaling Technology, Inc                    |
| GAPDH                            | mouse  | 1:1000   | abcam                                             |
| p38 MAPK                         | mouse  | 1:1000   | Cell Signaling Technology, Inc                    |
| p44/42 MAPK (Erk1/2)             | mouse  | 1:1000   | Cell Signaling Technology, Inc                    |
| Pan-Ras                          | mouse  | 1:2000   | EMD Calbiochem, Gibbstown, NJ                     |
| Phospho-cRaf                     | rabbit | 1:1000   | Cell Signaling Technology, Inc                    |
